# Supplementary material for: Identification of Transcription Factors for Lineage-Specific ESC Differentiation
Source: PubMed Central journal article supplement (PMC3871400; doi:10.1016/j.stemcr.2013.10.006), 2013-11-27
Supplement: mmc1.pdf [file mmc1.pdf]

# Stem Cell Reports, Volume 1

## Supplemental Information

### Identification of Transcription Factors

### for Lineage-Specific ESC Differentiation

Kohei Yamamizu, Yulan Piao, Alexei A. Sharov, Veronika Zsiros, Hong Yu, Kazu Nakazawa, David Schlessinger, and Minoru S.H. Ko

### Inventory of Supplemental Information

#### 1. Supplementary Figure S1-S7

**Supplemental Figure S1.** Correlation of gene expression response to the induction of TFs with tissue-specific gene expression. – related to Figure 1-5

**Supplemental Figure S2.** FACS analysis for mesoderm, endoderm, and neural progenitor markers using ES cells carrying *Myod1*, *Hnf4a*, or *Ascl1* gene – related to Figure 2, 3, and 5.

**Supplemental Figure S3.** Immunostaining for endoderm and hepatocyte markers, at differentiation 7 days using ES cells carrying *Hnf4a*, *Foxa1*, *Gata2*, *Gata3*, or *Gbx2* gene – related to Figure 3.

**Supplemental Figure S4.** Immunostaining for pan-neuron markers at differentiation 5 and 7 days using ESCs carrying *Ascl1* gene – related to Figure 5.

**Supplemental Figure S5.** Heat map from microarray data demonstrating global gene expression pattern in differentiated cells by induction of *Foxa1* – related to Figure 6.

**Supplemental Figure S6.** qPCR for lineage specific-genes at differentiation 7 days – related to Figure 6.

**Supplemental Figure S7.** Myogenic cells or neurons are induced by synthetic mRNA in a dose-dependent manner – related to Figure 7.

#### 2. Supplemental Table

**Supplemental Table 1.** Primer list for ChIP – related to Figure 6.

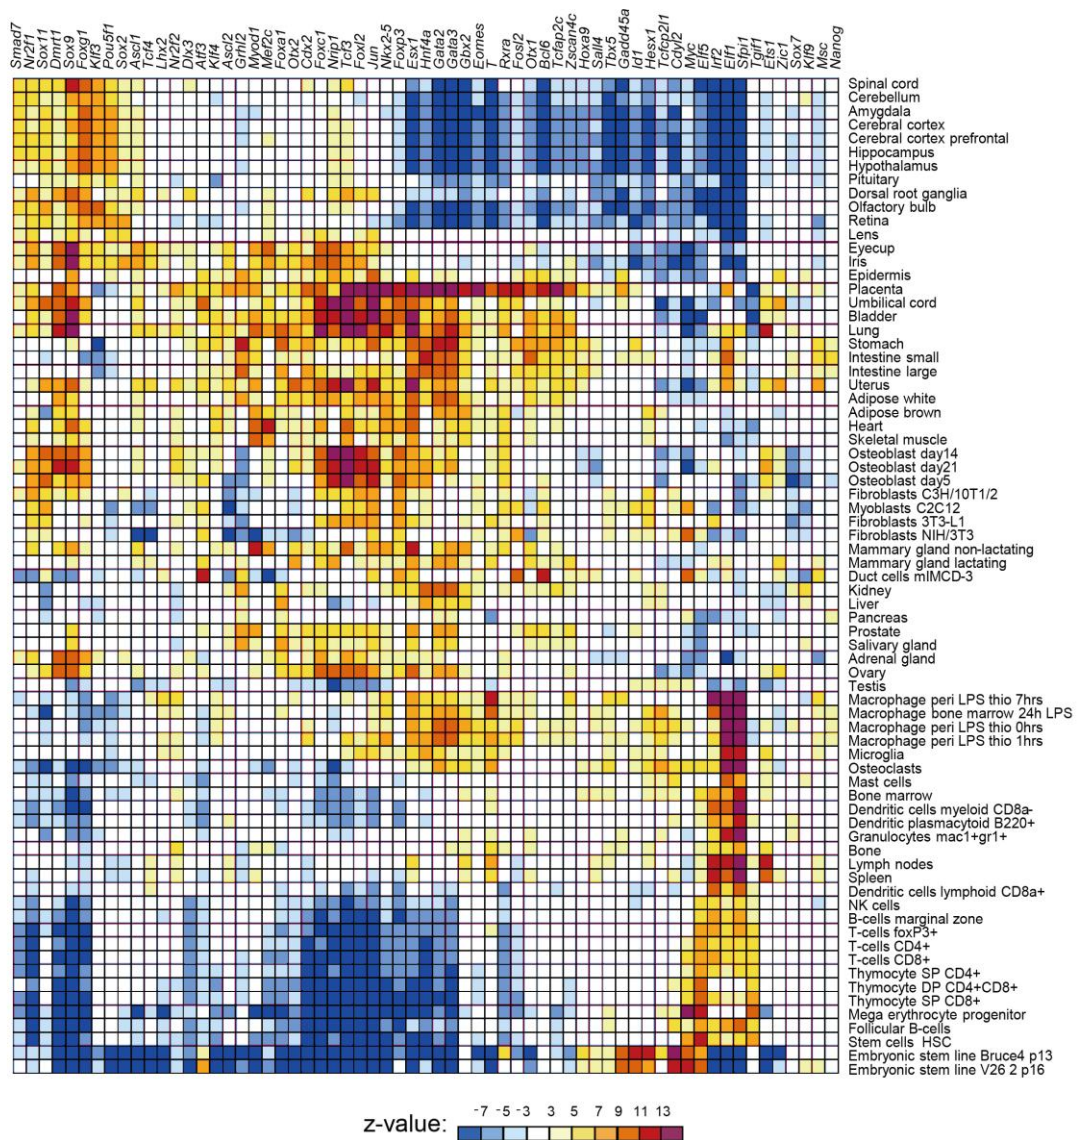

**Supplemental Figure 1 Correlation of gene expression response to the induction of TFs with tissue-specific gene expression from the GNF ver.3 database (Figure reproduced from Correa-Cerro et al., 2011).**

### A *Myod1* ES cells

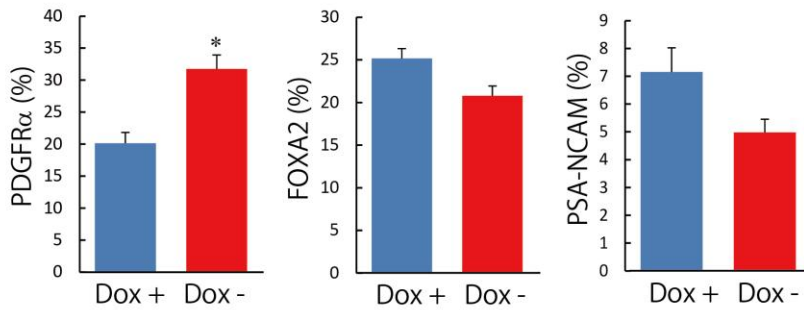

### B *Hnf4a* ES cells

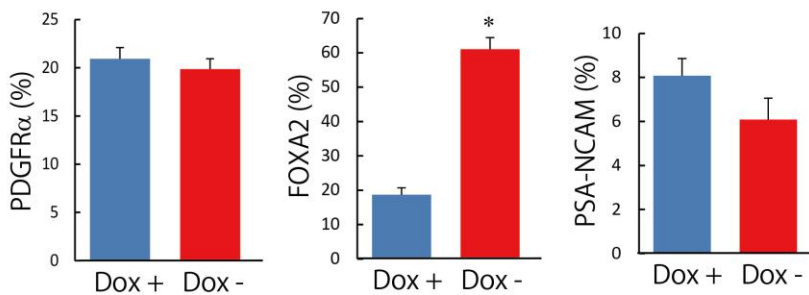

### C *Ascl1* ES cells

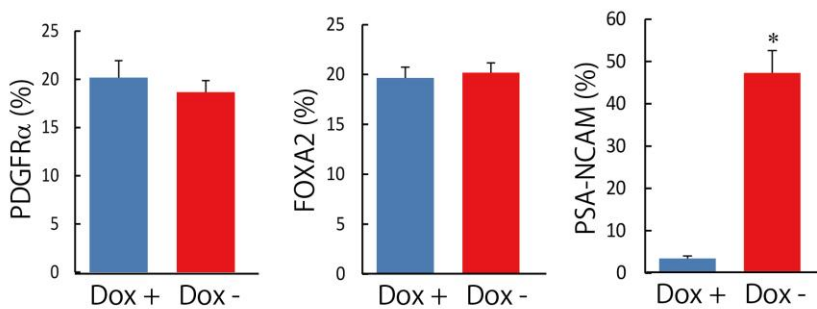

## Supplemental Figure 2 FACS analysis for mesoderm, endoderm, and neural progenitor markers using ES cells carrying *Myod1*, *Hnf4a*, or *Ascl1* gene.

FACS analysis for PDGFR $\alpha$  (mesoderm marker), FOXA2 (endoderm marker) at differentiation 5 days, and PSA-NCAM (neural progenitor marker) at differentiation 6 days using ES cells carrying *Myod1* (A), *Hnf4a* (B), or *Ascl1* (C) gene (n=3 (independent experiments); \*P<0.05 vs Dox+).

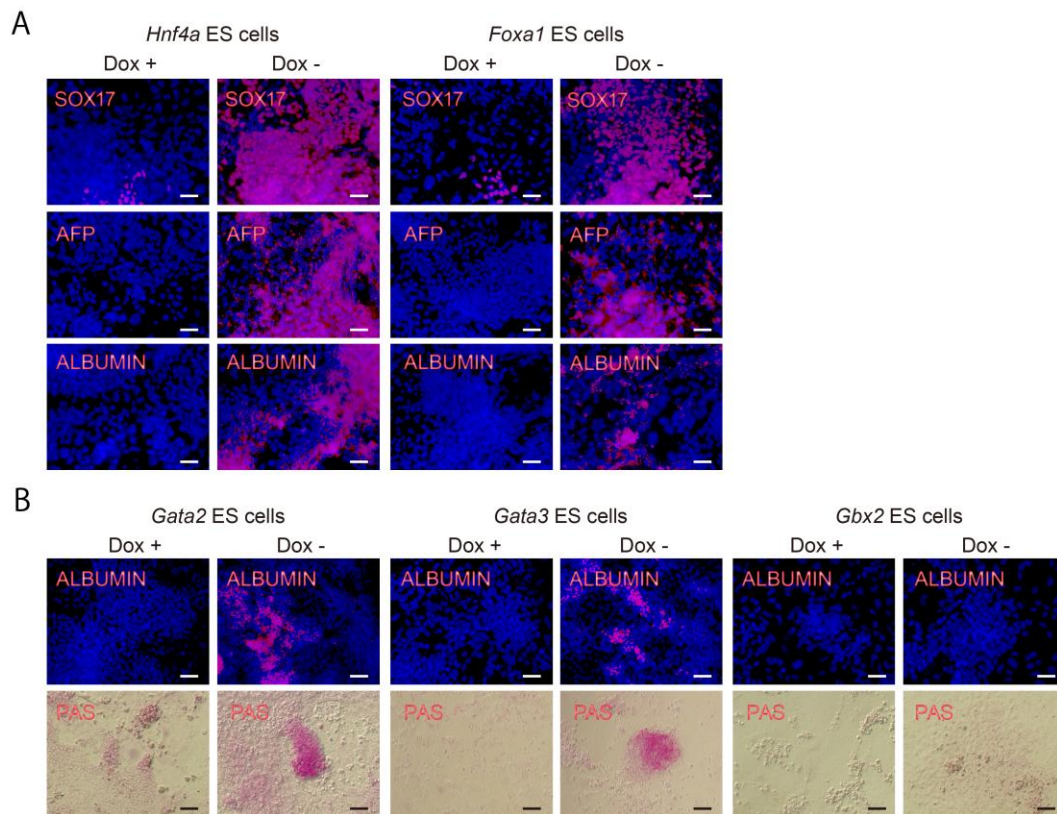

**Supplemental Figure 3 Induction of *Hnf4a*, *Foxa1*, *Gata2*, or *Gata3* generates hepatocytes from ES cells.**

(A) Immunostaining for SOX17 or  $\alpha$ -fetoprotein (AFP), endoderm markers, and albumin, a hepatocyte marker, at differentiation 7 days using ES cells carrying *Hnf4a* or *Foxa1* gene. Scale bar: 200  $\mu$ m. (B) Immunostaining for ALBUMIN, PAS staining, hepatocyte markers, at differentiation 7 days using ES cells carrying *Gata2*, *Gata3*, or *Gbx2* gene.

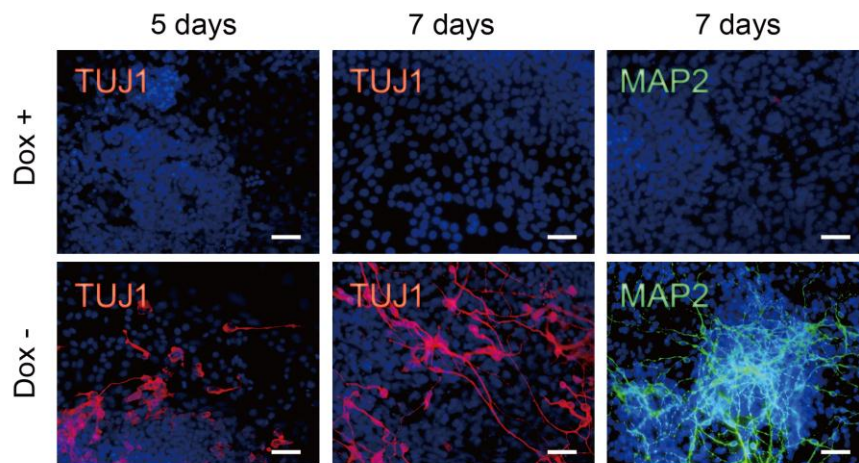

**Supplemental Figure 4 Induction of *Ascl1* generates neurons from ES cells.**

Immunostaining for  $\beta$ III-tubulin (TUJ1) and MAP2, pan-neuron markers, with DM at differentiation 5 and 7 days using ESCs carrying *Ascl1* gene. Upper panels, Dox+. Lower panels, Dox-. Scale bar: 200  $\mu$ m.



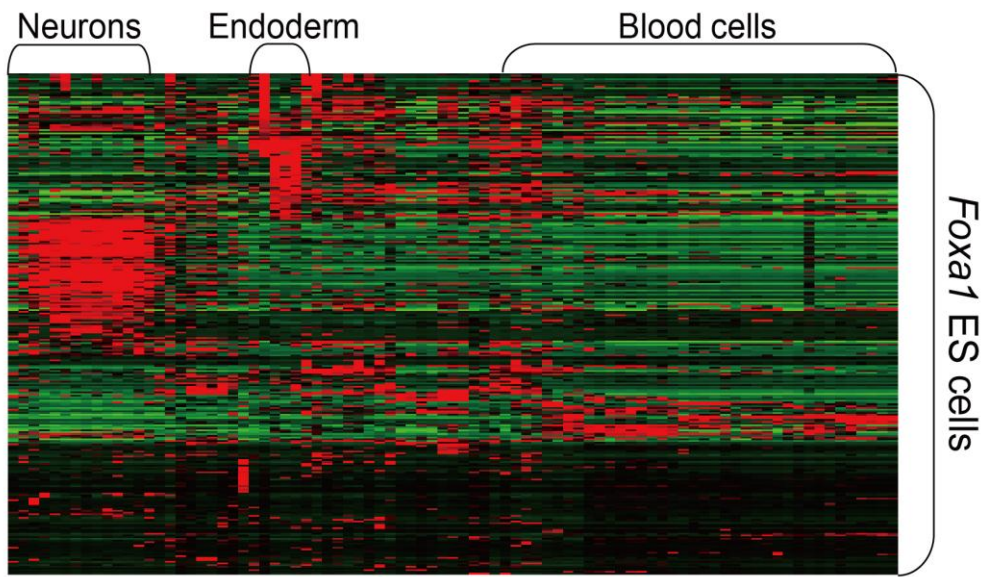

**Supplemental Figure 5 *Foxa1* associates with endoderm gene expression.**

Heat map from microarray data demonstrating global gene expression pattern in differentiated cells by induction of *Foxa1*. Red and green colors represent higher and lower gene expression levels, respectively.

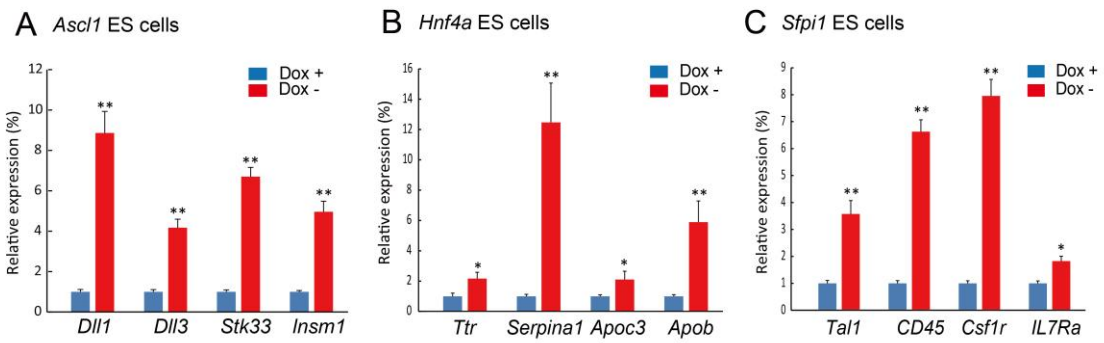

**Supplemental Figure 6 Induction of *Ascl1*, *Hnf4a*, or *Sfp1* increases organ-specific genes in differentiated cells.**

(A) qPCR for neuron specific-genes at differentiation 7 days using ES cells carrying *Ascl1* gene (n=3 (independent experiments); \*\*P<0.01 vs Dox+), (B) qPCR for hepatocyte specific-genes at differentiation 7 days using ES cells carrying *Hnf4a* gene (n=3; \*\*P<0.01, \*P<0.05 vs Dox+), (C) qPCR for blood cell specific-genes at differentiation 7 days using ES cells carrying *Sfp1* gene (n=3 (independent experiments); \*\*P<0.01, \*P<0.05 vs Dox+).

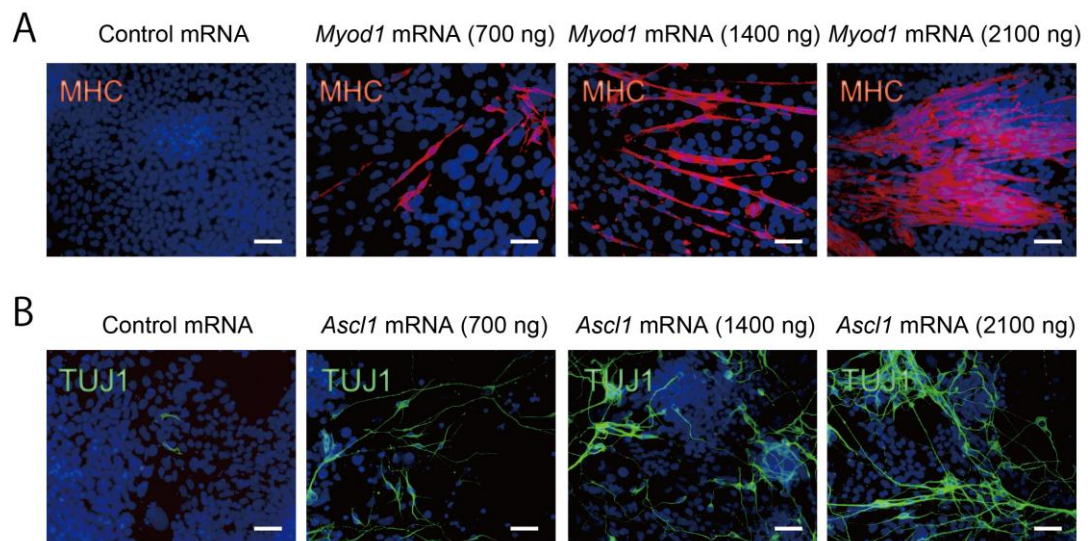

**Supplemental Figure 7 Transfection of *Myod1* mRNA or *Ascl1* mRNA induces myogenic cells or neurons, respectively, from ESCs in a dose-dependent manner.**

(A) Immunostaining for myosin heavy chain (MHC), a skeletal muscle marker, at differentiation 11 days with *Myod1* mRNA. Scale bar: 200  $\mu$ m. (B) Immunostaining for  $\beta$ III-tubulin (TUJ1), a pan-neuron marker, at differentiation 11 days with *Ascl1* mRNA. Scale bar: 200  $\mu$ m.



|                 |                        |
|-----------------|------------------------|
| ChIP Dll1 F     | gcgtggctgtcattaagg     |
| ChIP Dll1 R     | ggtgctgtctgcattacc     |
| ChIP Dll3 F     | attcctgtccgtttgctctc   |
| ChIP Dll3 R     | gtaaatgtcgccatctgc     |
| ChIP Stk33 F    | acagctgctggagagaggac   |
| ChIP Stk33 R    | acttgcccaagcctctgtg    |
| ChIP Insm1 F    | ttgggtgagcctgtcttag    |
| ChIP Insm1 R    | ccggccttatcttcacttc    |
| ChIP Ttr F      | aatctccctaggcaaggttca  |
| ChIP Ttr R      | tataccccctcctccaacc    |
| ChIP Serpina1 F | gagcaaacagagaggggcta   |
| ChIP Serpina1 R | agggatgggtgttctgactg   |
| ChIP Apoc3 F    | caggggcattacctggagta   |
| ChIP Apoc3 R    | ctcaggctctggctggact    |
| ChIP Apob F     | tgagaccaccatcagatcca   |
| ChIP Apob R     | aggaggagctggcttaagga   |
| ChIP Tal1 F     | cggggagactctcttccttc   |
| ChIP Tal1 R     | ctcacgcaagcactctcaac   |
| ChIP CD45 F     | gggtcctctttgcaggaagt   |
| ChIP CD45 R     | agacgaaccgctaacagcat   |
| ChIP Csf1r F    | ttcccttcaggcaacctaa    |
| ChIP Csf1r R    | gctcccagctgctgtagttctg |
| ChIP IL7Ra F    | gagagagggagacccaaacc   |
| ChIP IL7Ra R    | tctgcttacagcagcaatcc   |

**Supplemental Table 1: Primer list for ChIP**
